# Supplementary material for: Nanorod bundle-like silver cyanamide nanocrystals for the high-efficiency photocatalytic degradation of tetracycline
Source: Royal Society of Chemistry journal article supplement (doi:10.1039/d1ra00770j), 2021-01-01
Supplement: d1ra00770j1.pdf [file d1ra00770j1.pdf]

Electronic Supplementary Information (ESI) for

**Nanorod bundle-like silver cyanamide nanoparticles for  
high-efficiency photocatalytic degradation of tetracycline**

Yulin Li, Chencong Cao, Qing Zhang, Ying Lu, Yanxi Zhao, Qin Li, Xianghong Li,  
Tao Huang\*

*Key Laboratory of Catalysis and Energy Materials Chemistry of Ministry of  
Education, College of Chemistry and Materials Science, South-central University for  
Nationalities, Wuhan 430074, China*

\*Correspondence E-mail: [huangt208@163.com](mailto:huangt208@163.com)

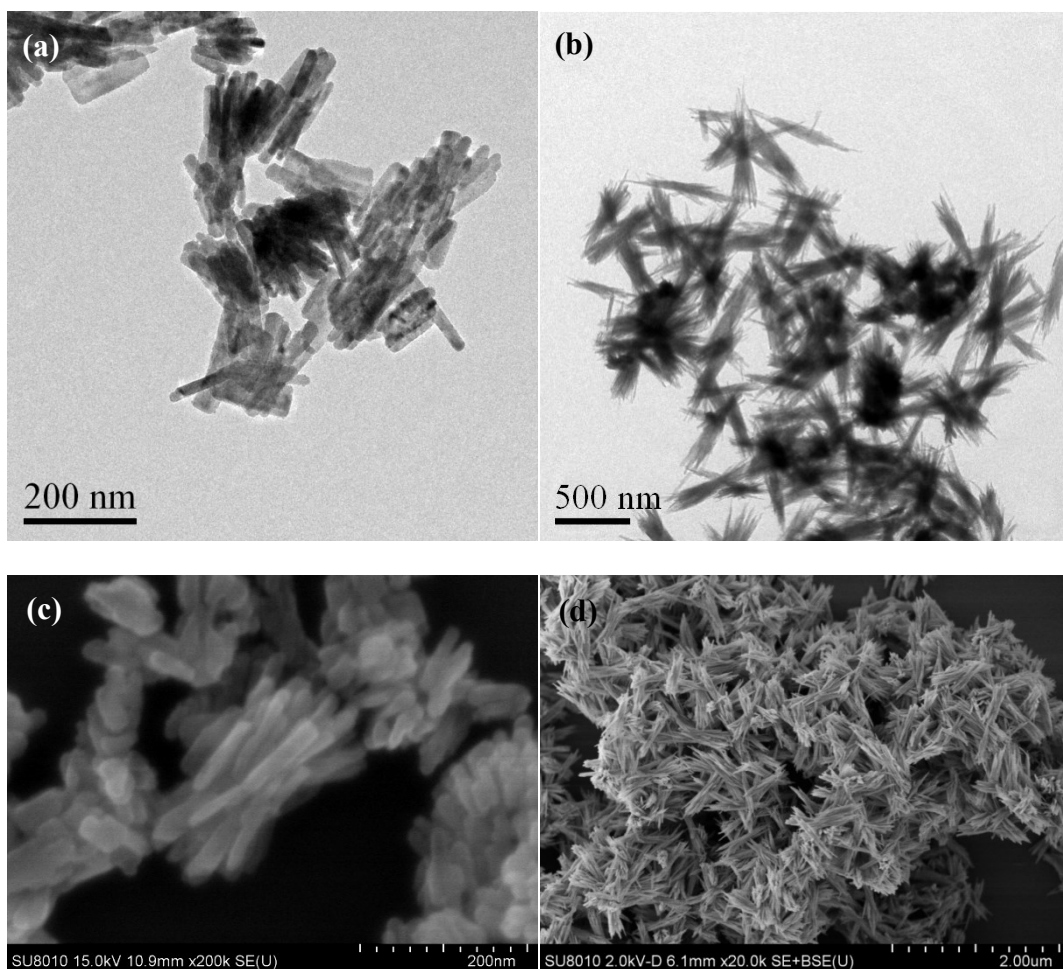

**Figure S1** TEM and SEM images of RB and SB samples. (a) TEM image of RB samples; (b) TEM image of SB samples; (c) SEM image of RB samples; (d) SEM image of SB samples.

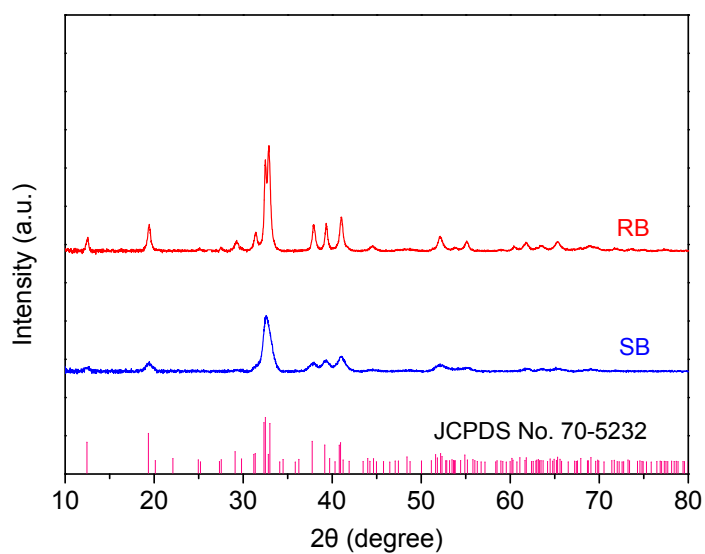

**Figure S2** XRD patterns of SB and RB samples.

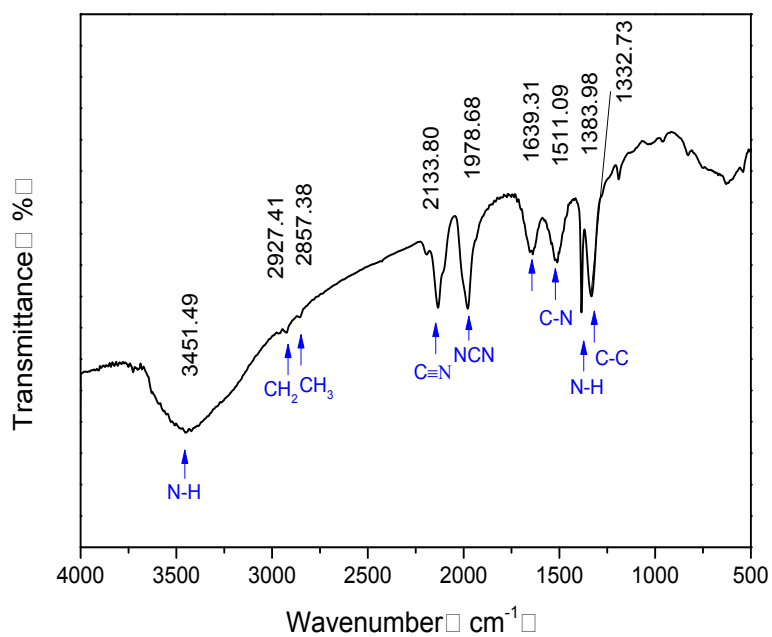

**Figure S3** The FT-IR spectra of RB samples.

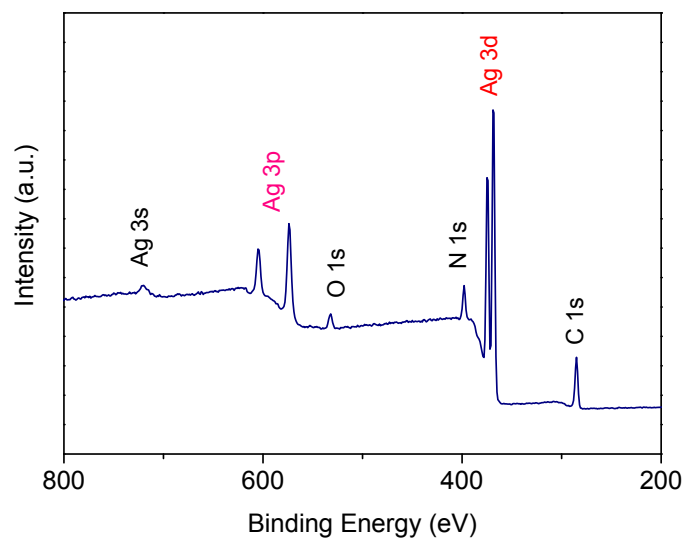

**Figure S4** The full-scale XPS spectra of RB samples.

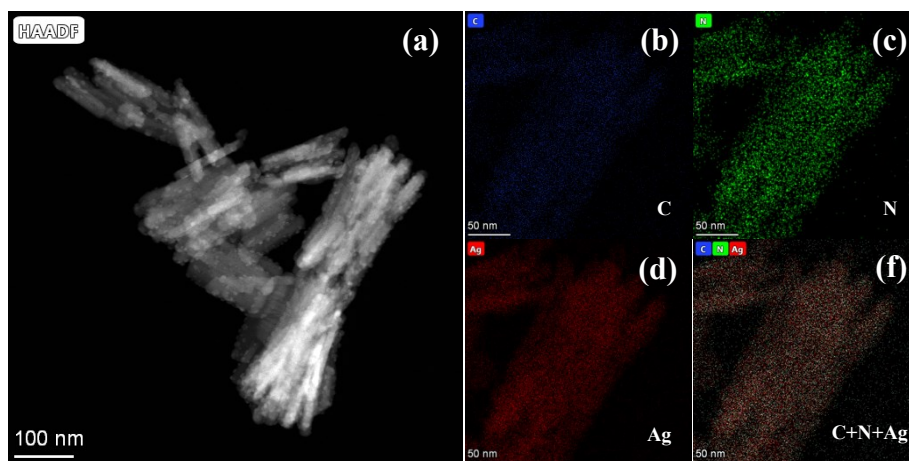

**Figure S5** EDS mapping analyses for RB samples. (a) HAAADF image; (b) C; (c) N; (d) Ag; (f) C+N+Ag.

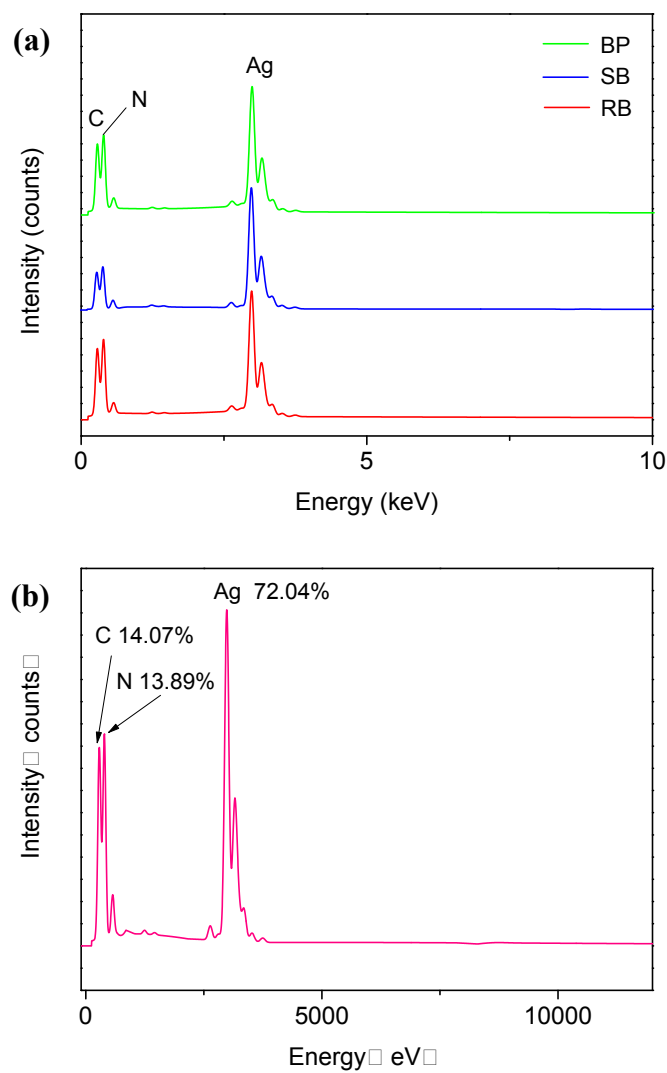

**Figure S6** EDS spot analyses. (a) RB, SB and BP samples; (b) RB samples.

**Table S1** Elemental contents in RB and SB samples obtained by EDS spot analyses

| Sample             | Ag    | C     | N     |
|--------------------|-------|-------|-------|
| Normal Ratio (wt%) | 84.35 | 4.70  | 10.95 |
| RB                 | 72.04 | 14.07 | 13.89 |
| SB                 | 81.28 | 8.86  | 9.86  |
| BP                 | 86.54 | 5.93  | 7.54  |

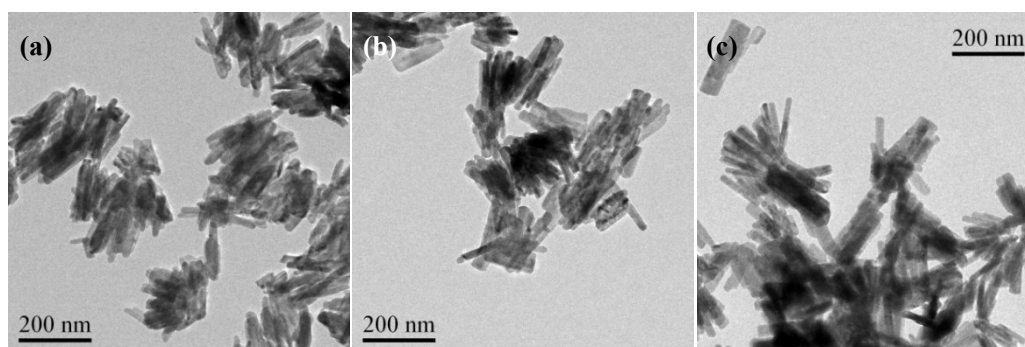

**Figure S7** TEM images of  $\text{Ag}_2\text{NCN}$  nanocrystals prepared in n-octylamine system at different temperatures. (a) 0 °C; (b) 25 °C; (c) 60 °C.

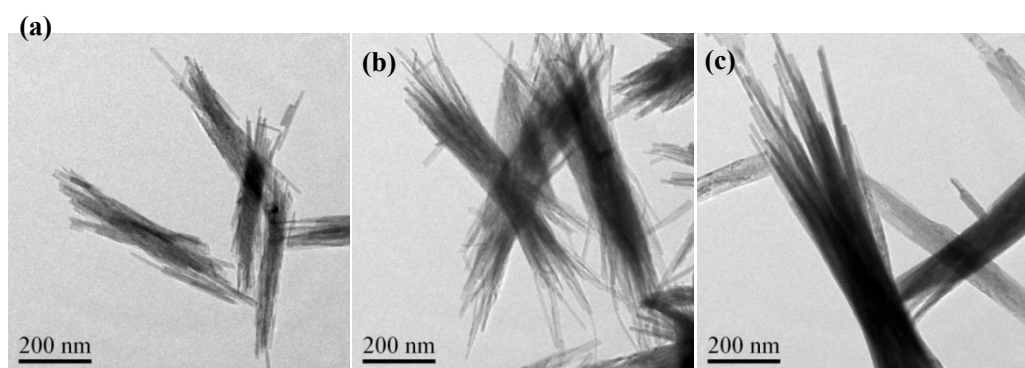

**Figure S8** TEM images of  $\text{Ag}_2\text{NCN}$  nanocrystals prepared in t-butylamine system at different temperatures. (a) 0 °C; (b) 25 °C; (c) 60 °C.

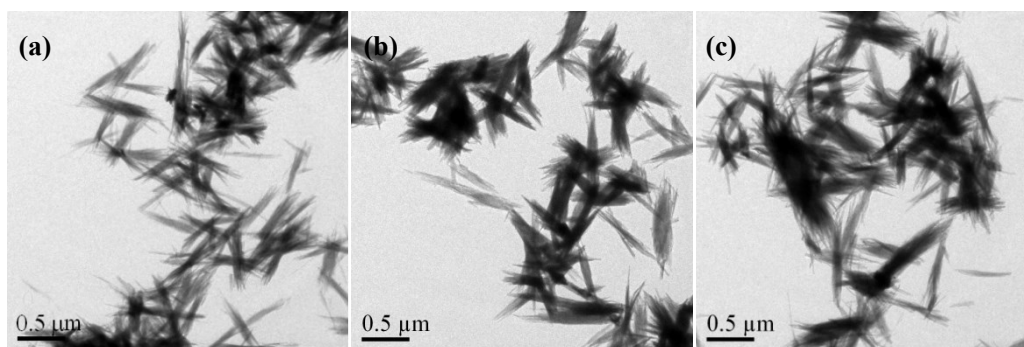

**Figure S9** TEM images of  $\text{Ag}_2\text{NCN}$  nanocrystals prepared in t-butylamine system at different times. (a) 30 min; (b) 1 h; (c) 2 h.

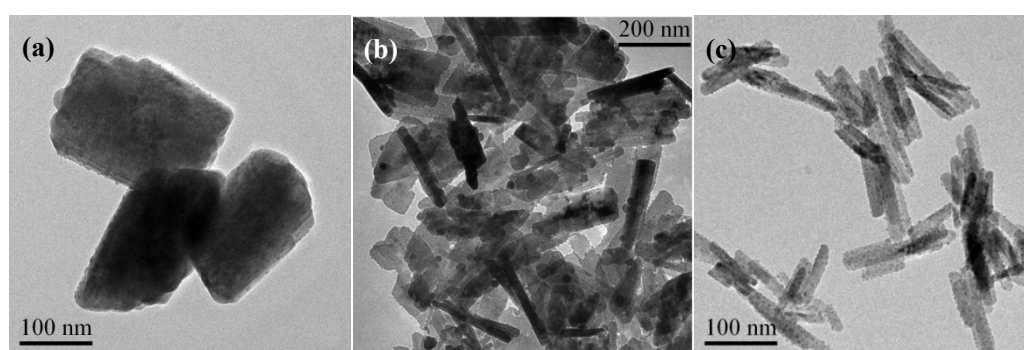

**Figure S10** TEM images of  $\text{Ag}_2\text{NCN}$  nanocrystals obtained with using ethylamine (a), n-butylamine (b) or oleylamine (c).

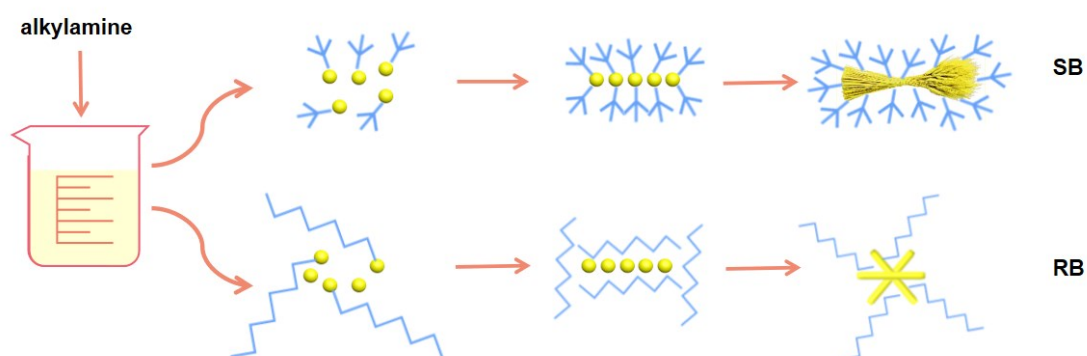

**Figure S11** Scheme illustration for the growth process of SB and RB nanostructures.

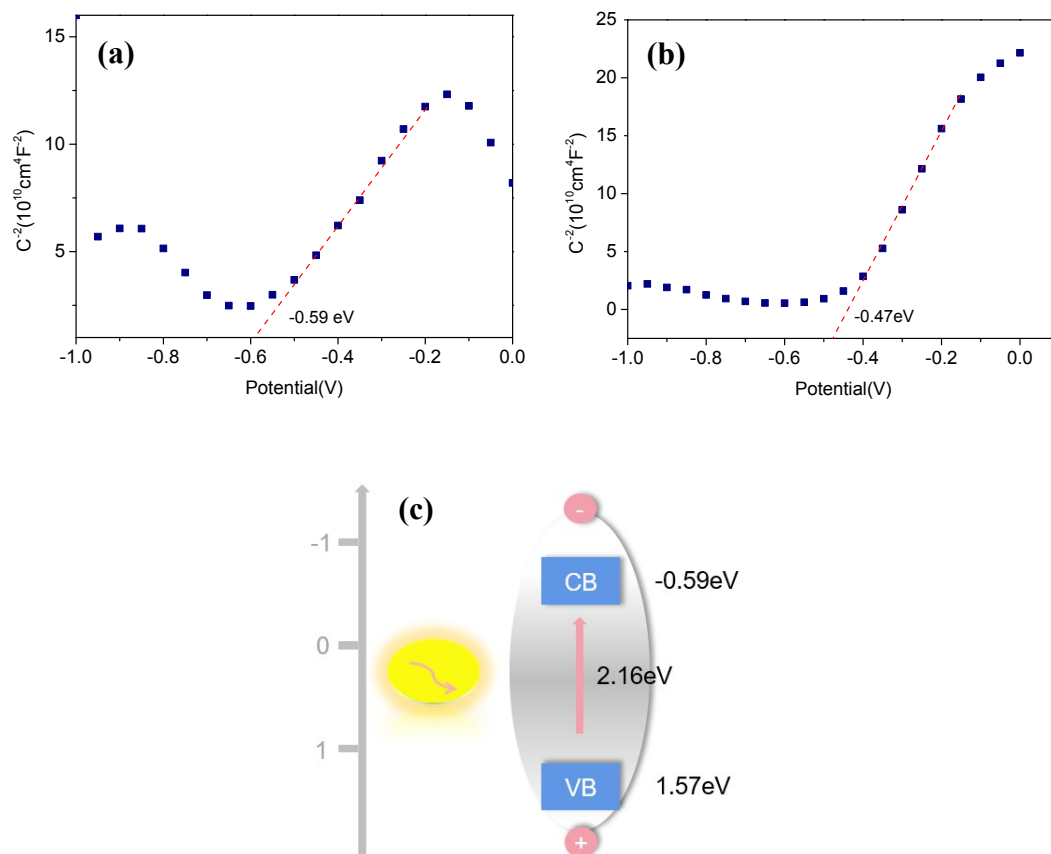

**Figure S12** (a) and (b) Mott-Schottky plots of RB and SB samples; (c) The band structure diagram of RB.

**Table S2** The energy band structures of the as-prepared  $\text{Ag}_2\text{NCN}$  nanoparticles

| Samples | $E_g/\text{eV}$ | $E_{\text{CB}}/\text{V}$ | $E_{\text{VB}}/\text{V}$ |
|---------|-----------------|--------------------------|--------------------------|
| RB      | 2.16            | -0.59                    | 1.57                     |
| SB      | 2.24            | -0.47                    | 1.77                     |

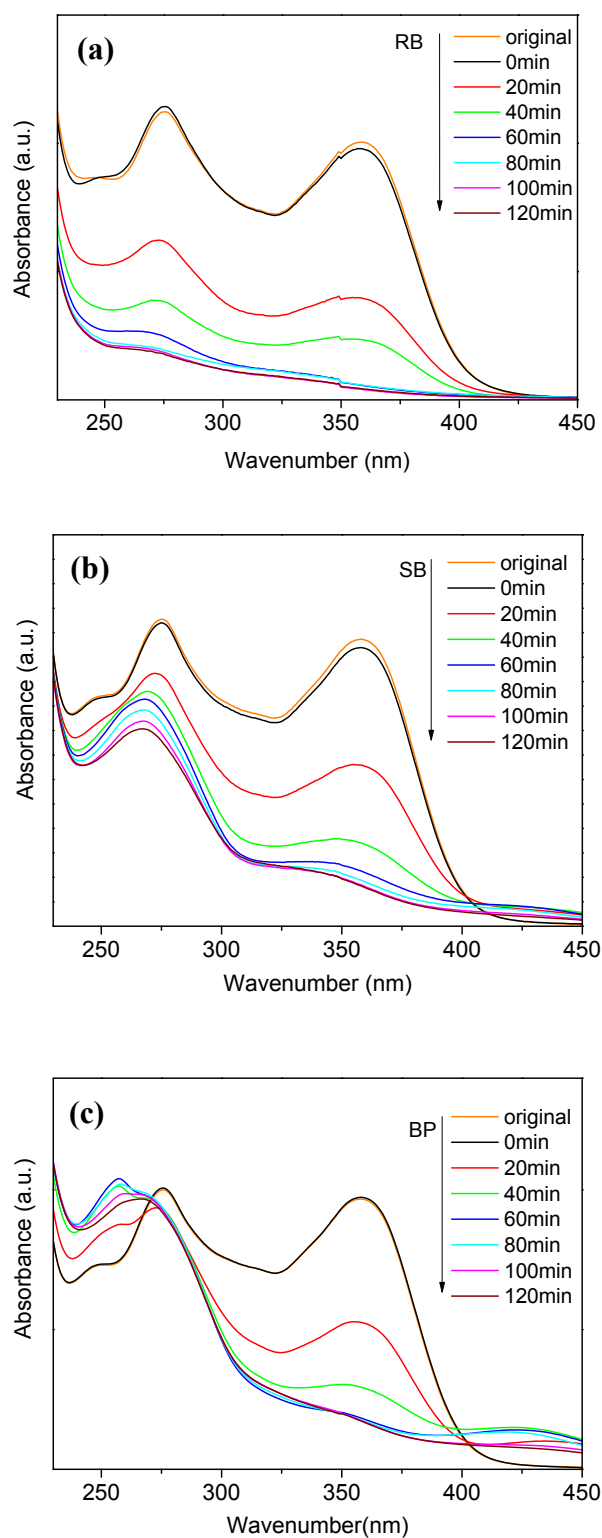

**Figure S13** UV-vis adsorption spectra of TC in photocatalytic degradation process in 120 min over RB samples (a), SB samples (b) and BP samples (c)



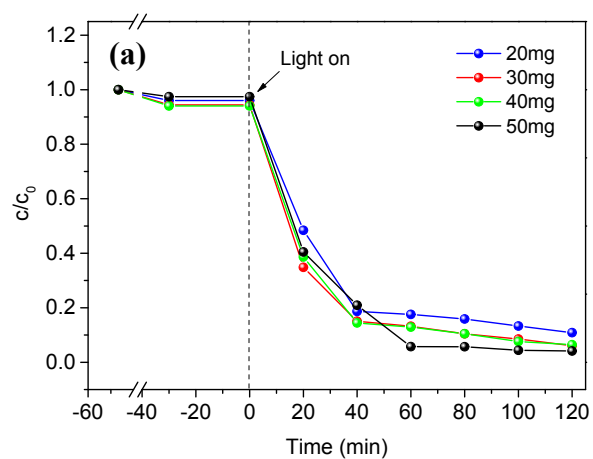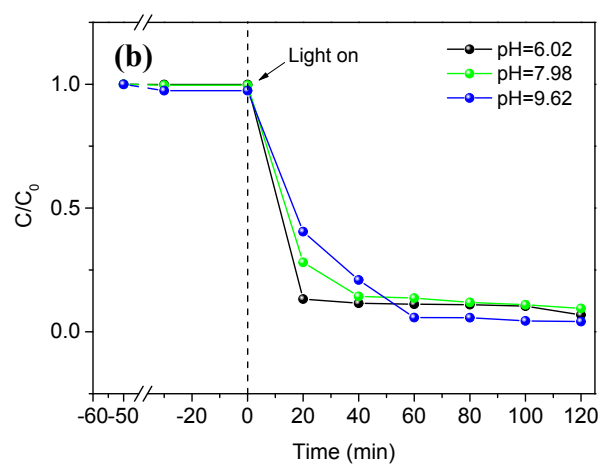

**Figure S14** (a) The effect of the catalyst dosage on the photocatalytic degradation process; (b) The effects of pH values on the photocatalytic degradation process.

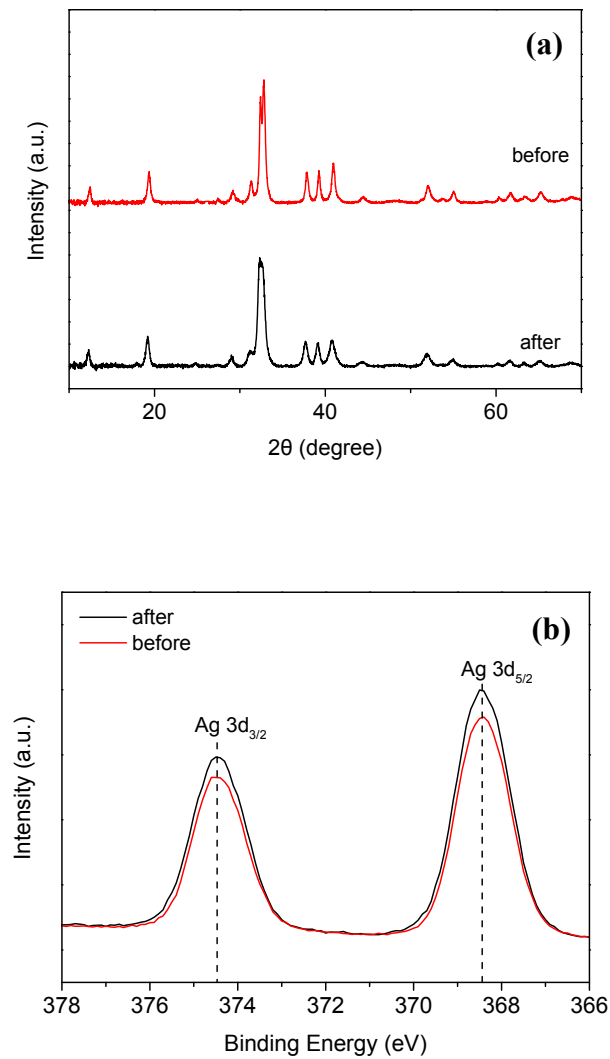

**Figure S15** XRD pattern (a) and XPS spectra (b) of RB samples after four cycles.

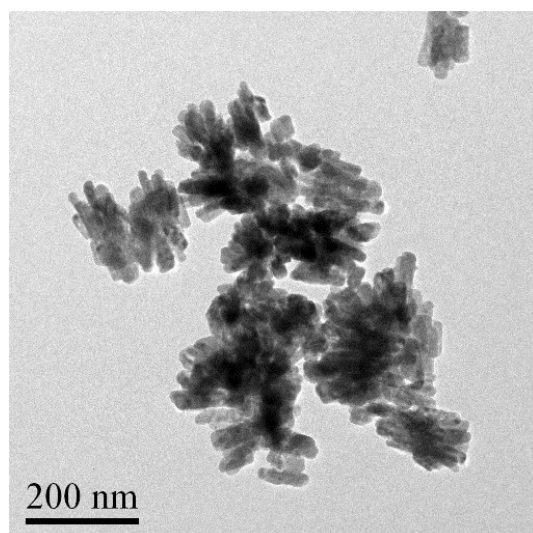

**Figure S16** TEM images of RB samples after four cycles.

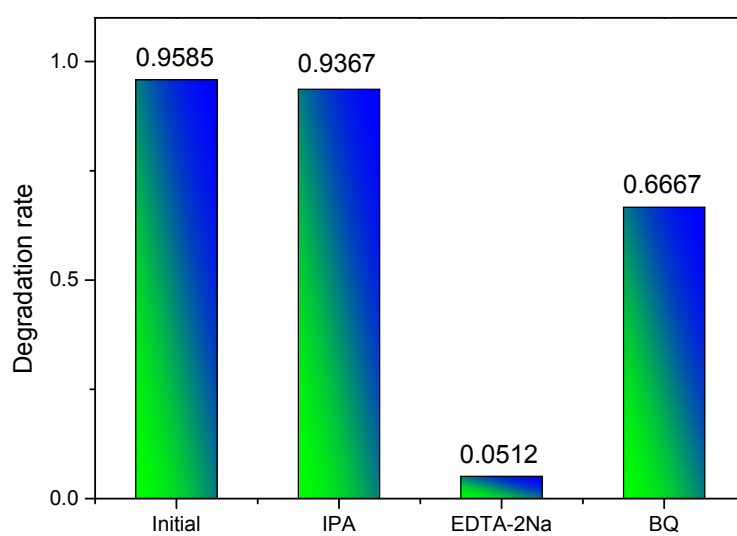

**Figure S17** The degradation rate of TC over RB samples with different quenchers.

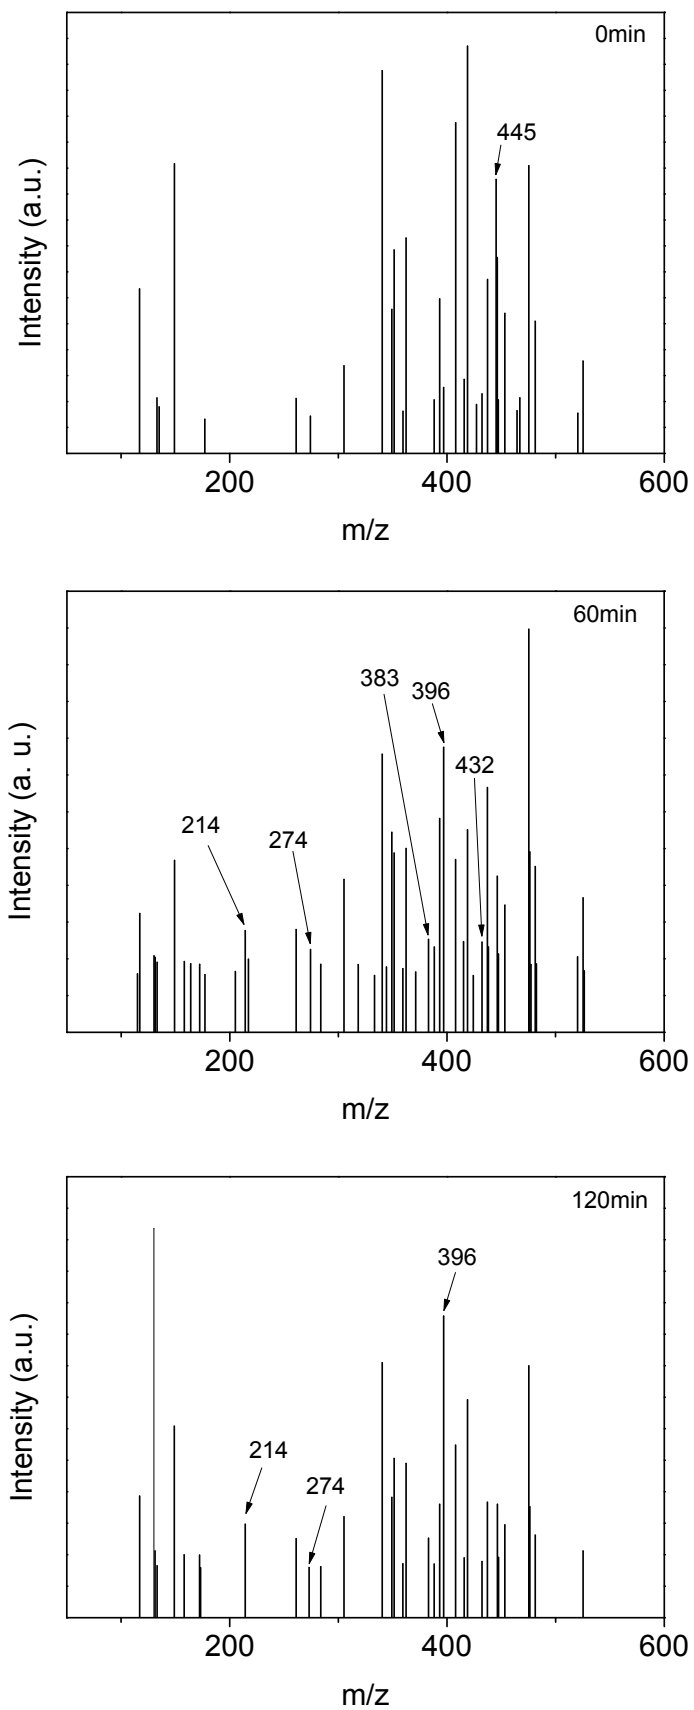

**Figure S18** HPLC-MS spectrograms for the intermediate products at different

degradation time.

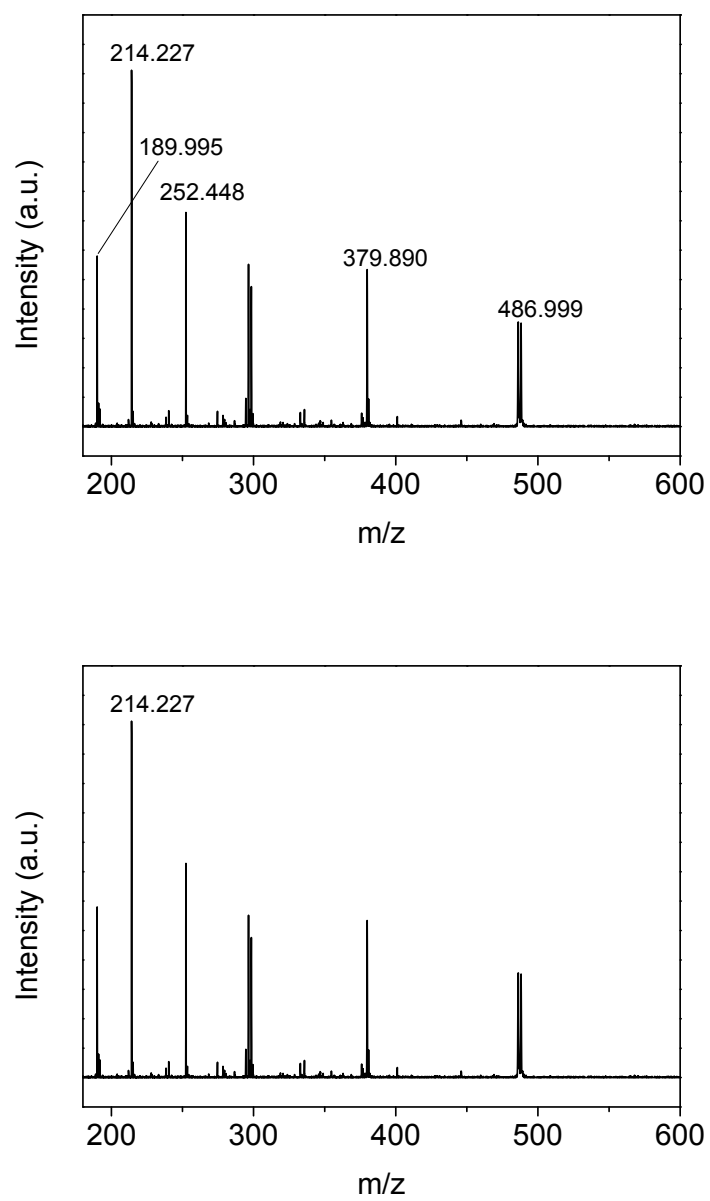

**Figure S19** MALDI-TOF-MS spectrograms for the intermediate products in 120-min degradation.

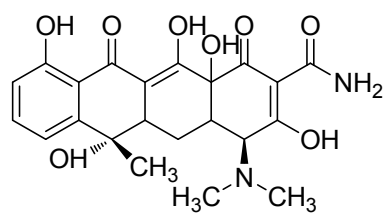

$m/z = 445$

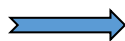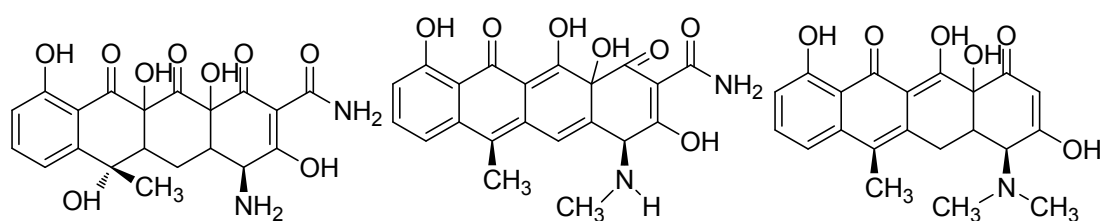

$m/z = 432$

$m/z = 396$

$m/z = 383$

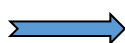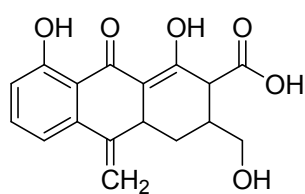

$m/z = 318$

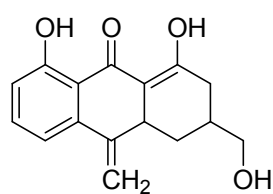

$m/z = 274$

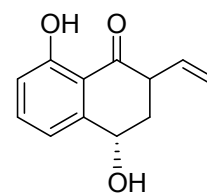

$m/z = 214$

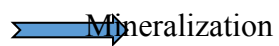

$\text{CO}_2 + \text{H}_2\text{O}$

**Figure S20** The possible pathway for the photocatalytic degradation of TC.
